# Supplementary material
Source: PubMed Central journal article supplement (PMC6439920)
Supplement: jama-321-1069-s001.pdf [file jama-321-1069-s001.pdf]

## Supplemental Online Content

Fanaroff AC, Califf RM, Windecker S, Smith SC Jr, Lopes RD. Levels of evidence supporting American College of Cardiology/American Heart Association and European Society of Cardiology Guidelines, 2008-2018. *JAMA*. doi:10.1001/jama.2019.1122

**eTable 1.** Levels of Evidence by Guideline and Category of Recommendation (ACC/AHA Guidelines)

**eTable 2.** Levels of Evidence by Guideline and Category of Recommendation (ESC Guidelines)

**eFigure.** Proportion of Recommendations Characterized as Level of Evidence A by Year of Guideline Document Release

**eReferences**

This supplemental material has been provided by the authors to give readers additional information about their work.

**eTable 1.** Levels of Evidence by guideline and Category of Recommendation (ACC/AHA Guidelines)

| Guideline (N recommendations)                                                        | Year | Overall   |           |           | Class I   |           |           | Class II |           |           | Class III |           |          |
|--------------------------------------------------------------------------------------|------|-----------|-----------|-----------|-----------|-----------|-----------|----------|-----------|-----------|-----------|-----------|----------|
|                                                                                      |      | A         | B         | C         | A         | B         | C         | A        | B         | C         | A         | B         | C        |
| <i>General cardiology</i>                                                            |      |           |           |           |           |           |           |          |           |           |           |           |          |
| Blood cholesterol (n = 72) <sup>1</sup>                                              | 2018 | 11 (15.3) | 48 (66.7) | 13 (18.1) | 10 (35.7) | 15 (53.6) | 3 (10.7)  | 1 (2.4)  | 31 (75.6) | 9 (22.0)  | 0 (0)     | 2 (66.7)  | 1 (33.3) |
| High Blood pressure in Adults (n = 116) <sup>2</sup>                                 | 2017 | 21 (18.1) | 49 (42.2) | 46 (39.7) | 17 (25)   | 26 (38.2) | 25 (36.8) | 1 (2.4)  | 20 (48.8) | 20 (48.8) | 3 (42.9)  | 3 (42.9)  | 1 (14.3) |
| Syncope (n = 103) <sup>3</sup>                                                       | 2017 | 0 (0)     | 55 (53.4) | 48 (46.6) | 0 (0)     | 9 (34.6)  | 17 (65.4) | 0 (0)    | 35 (53)   | 31 (47)   | 0 (0)     | 11 (100)  | 0 (0)    |
| Perioperative cardiovascular evaluation for noncardiac surgery (n = 69) <sup>4</sup> | 2014 | 3 (4.3)   | 37 (53.6) | 29 (42)   | 1 (6.3)   | 5 (31.3)  | 10 (62.5) | 1 (2.6)  | 22 (57.9) | 15 (39.5) | 1 (6.7)   | 10 (66.7) | 4 (26.7) |
| Cardiovascular risk (n = 6) <sup>5</sup>                                             | 2013 | 0 (0)     | 4 (66.7)  | 2 (33.3)  | 0 (0)     | 1 (100)   | 0 (0)     | 0 (0)    | 2 (50)    | 2 (50)    | 0 (0)     | 1 (100)   | 0 (0)    |
| Lifestyle management to reduce cardiovascular risk (n = 10) <sup>6</sup>             | 2013 | 9 (90)    | 1 (10)    | 0 (0)     | 7 (100)   | 0 (0)     | 0 (0)     | 2 (66.7) | 1 (33.3)  | 0 (0)     | --*       | --*       | --*      |
| Overweight and obesity in adults (n = 16) <sup>7</sup>                               | 2013 | 11 (68.8) | 3 (18.8)  | 2 (12.5)  | 7 (70)    | 2 (20)    | 1 (10)    | 4 (66.7) | 1 (16.7)  | 1 (16.7)  | --*       | --*       | --*      |
| Cardiovascular disease prevention in women (n = 39) <sup>8</sup>                     | 2011 | 12 (30.8) | 26 (66.7) | 1 (2.6)   | 9 (32.1)  | 19 (67.9) | 0 (0)     | 0 (0)    | 6 (60.0)  | 4 (40.0)  | 3 (75.0)  | 1 (25.0)  | 0 (0)    |

| Guideline (N recommendations)                                     | Year | Overall          |                   |                   | Class I           |                   |                   | Class II       |                   |                   | Class III        |                   |                   |
|-------------------------------------------------------------------|------|------------------|-------------------|-------------------|-------------------|-------------------|-------------------|----------------|-------------------|-------------------|------------------|-------------------|-------------------|
|                                                                   |      | A                | B                 | C                 | A                 | B                 | C                 | A              | B                 | C                 | A                | B                 | C                 |
| Cardiovascular risk in asymptomatic adults (n = 35) <sup>9</sup>  | 2010 | 0 (0)            | 24 (68.6)         | 11 (31.4)         | 0 (0)             | 4 (100)           | 0 (0)             | 0 (0)          | 14 (77.8)         | 4 (22.2)          | 0 (0)            | 6 (46.2)          | 7 (53.8)          |
| <i>General cardiology summary, median (IQR), %</i>                | --   | 15.3 (0.0, 30.8) | 53.6 (42.2, 66.7) | 31.4 (12.5, 39.7) | 24.3 (0.0, 37.5)  | 34.6 (29.7, 53.6) | 10.7 (0, 45.9)    | 2.4 (0.0, 3.7) | 50.0 (33.3, 57.9) | 39.5 (22.0, 48.8) | 0.0 (0.0, 7.9)   | 66.7 (44.5, 83.3) | 26.7 (7.1, 43.5)  |
| <i>Coronary artery disease</i>                                    |      |                  |                   |                   |                   |                   |                   |                |                   |                   |                  |                   |                   |
| Non-ST-elevation acute coronary syndromes (n = 179) <sup>10</sup> | 2014 | 27 (15.1)        | 92 (51.4)         | 60 (33.5)         | 22 (20.2)         | 49 (45)           | 38 (34.9)         | 0 (0)          | 33 (63.5)         | 19 (36.5)         | 5 (27.8)         | 10 (55.6)         | 3 (16.7)          |
| Stable ischemic heart disease (n = 159) <sup>11</sup>             | 2014 | 14 (8.8)         | 79 (49.7)         | 66 (41.5)         | 9 (15.8)          | 34 (59.6)         | 14 (24.6)         | 2 (2.7)        | 38 (51.4)         | 34 (45.9)         | 3 (10.7)         | 7 (25)            | 18 (64.3)         |
| ST-elevation myocardial infarction (n = 123) <sup>12</sup>        | 2012 | 16 (13)          | 74 (60.2)         | 33 (26.8)         | 14 (18.7)         | 42 (56)           | 19 (25.3)         | 2 (5.1)        | 24 (61.5)         | 13 (33.3)         | 0 (0)            | 8 (88.9)          | 1 (11.1)          |
| Coronary artery bypass graft surgery (n = 164) <sup>13</sup>      | 2011 | 15 (9.1)         | 98 (59.8)         | 51 (31.1)         | 10 (16.4)         | 38 (62.3)         | 13 (21.3)         | 5 (5.6)        | 55 (61.8)         | 29 (32.6)         | 0 (0)            | 5 (35.7)          | 9 (64.3)          |
| Percutaneous coronary intervention (n = 178) <sup>14</sup>        | 2011 | 22 (12.4)        | 90 (50.6)         | 66 (37.1)         | 13 (19.4)         | 34 (50.7)         | 20 (29.9)         | 5 (6.1)        | 43 (52.4)         | 34 (41.5)         | 4 (13.8)         | 13 (44.8)         | 12 (41.4)         |
| <i>Coronary artery disease summary, median (IQR), %</i>           | --   | 12.4 (9.1-13.0)  | 51.4 (50.6, 59.8) | 33.5 (31.1, 37.1) | 18.7 (16.4, 19.4) | 56.0 (50.7, 59.6) | 25.3 (24.6, 29.9) | 5.1 (2.7, 5.6) | 61.5 (52.4, 61.8) | 36.5 (33.3, 41.5) | 10.7 (0.0, 13.8) | 44.8 (35.7, 55.6) | 41.4 (16.7, 64.3) |
| <i>Vascular medicine</i>                                          |      |                  |                   |                   |                   |                   |                   |                |                   |                   |                  |                   |                   |

| Guideline (N recommendations)                                            | Year | Overall            |                      |                      | Class I             |                      |                      | Class II          |                      |                      | Class III         |                      |                      |
|--------------------------------------------------------------------------|------|--------------------|----------------------|----------------------|---------------------|----------------------|----------------------|-------------------|----------------------|----------------------|-------------------|----------------------|----------------------|
|                                                                          |      | A                  | B                    | C                    | A                   | B                    | C                    | A                 | B                    | C                    | A                 | B                    | C                    |
| Lower extremity peripheral artery disease (n = 88) <sup>15</sup>         | 2016 | 16<br>(18.2)       | 40<br>(45.5)         | 32<br>(36.4)         | 11<br>(26.8)        | 12<br>(29.3)         | 18<br>(43.9)         | 4<br>(10.8)       | 19<br>(51.4)         | 14<br>(37.8)         | 1<br>(10)         | 9<br>(90)            | 0<br>(0)             |
| Extracranial carotid and vertebral artery disease (n = 97) <sup>16</sup> | 2011 | 7 (7.2)            | 25<br>(25.8)         | 65<br>(67)           | 4<br>(12.5)         | 11<br>(34.4)         | 17<br>(53.1)         | 2<br>(3.7)        | 13<br>(24.1)         | 39<br>(72.2)         | 1 (9.1)           | 1 (9.1)              | 9<br>(81.8)          |
| Thoracic aortic disease (n = 120) <sup>17</sup>                          | 2010 | 0 (0)              | 45<br>(37.5)         | 75<br>(62.5)         | 0 (0)               | 25<br>(35.7)         | 45<br>(64.3)         | 0 (0)             | 18<br>(40.9)         | 26<br>(59.1)         | 0 (0)             | 2<br>(33.3)          | 4<br>(66.7)          |
| <i>Vascular medicine summary, median (IQR), %</i>                        | --   | 7.2<br>(3.6, 12.7) | 37.5<br>(31.7, 41.5) | 62.5<br>(49.4, 64.8) | 12.5<br>(6.3, 19.7) | 34.4<br>(31.9, 35.1) | 53.1<br>(48.5, 58.7) | 3.7<br>(1.9, 7.3) | 40.9<br>(32.5, 46.2) | 59.1<br>(48.4, 65.7) | 9.1<br>(4.5, 9.5) | 33.3<br>(21.2, 61.6) | 66.7<br>(33.3, 73.9) |
| <i>Congenital and valvular heart disease</i>                             |      |                    |                      |                      |                     |                      |                      |                   |                      |                      |                   |                      |                      |
| Adults with congenital heart disease (n = 179) <sup>18</sup>             | 2018 | 1 (0.6)            | 87<br>(48.6)         | 91<br>(50.8)         | 1<br>(1.1)          | 45<br>(50)           | 44<br>(48.9)         | 0 (0)             | 41<br>(48.8)         | 43<br>(51.2)         | 0 (0)             | 1 (20)               | 4 (80)               |
| Valvular heart disease (n = 227) <sup>19</sup>                           | 2014 | 7 (3.1)            | 107<br>(47.1)        | 113<br>(49.8)        | 6<br>(5.4)          | 52<br>(46.8)         | 53<br>(47.7)         | 0 (0)             | 45<br>(44.1)         | 57<br>(55.9)         | 1 (7.1)           | 10<br>(71.4)         | 3<br>(21.4)          |
| <i>Congenital and valvular heart disease summary, median (IQR), %</i>    | --   | 1.8<br>(1.2-2.8)   | 47.8<br>(47.5, 48.2) | 50.3<br>(50.1-50.5)  | 3.3<br>(2.2, 4.3)   | 48.4<br>(47.6, 49.2) | 48.3<br>(48.0, 48.6) | 0 (0, 0)          | 46.4<br>(45.3, 47.6) | 53.5<br>(52.4, 54.7) | 3.5<br>(1.8, 5.3) | 45.7<br>(32.9, 58.5) | 50.7<br>(36.1, 65.3) |
| <i>Heart failure and myocardial disease</i>                              |      |                    |                      |                      |                     |                      |                      |                   |                      |                      |                   |                      |                      |
| Heart failure (n = 136) <sup>20</sup>                                    | 2013 | 26<br>(19.1)       | 66<br>(48.5)         | 44<br>(32.4)         | 19<br>(33.3)        | 17<br>(29.8)         | 21<br>(36.8)         | 5<br>(8.2)        | 40<br>(65.6)         | 16<br>(26.2)         | 2<br>(11.1)       | 9 (50)               | 7<br>(38.9)          |
| Hypertrophic cardiomyopathy (n = 124) <sup>21</sup>                      | 2011 | 0 (0)              | 46<br>(37.1)         | 78<br>(62.9)         | 0 (0)               | 22<br>(56.4)         | 17<br>(43.6)         | 0 (0)             | 18<br>(30.5)         | 41<br>(69.5)         | 0 (0)             | 6<br>(23.1)          | 20<br>(76.9)         |
| <i>Heart failure and myocardial disease</i>                              | --   | 9.5<br>(4.8, 14.3) | 42.8<br>(40.0, 45.7) | 47.6<br>(40.0, 55.3) | 16.6<br>(8.3, 25.0) | 43.1<br>(36.4, 49.7) | 40.2<br>(38.5, 41.9) | 4.1<br>(2.0, 6.1) | 48.0<br>(39.3, 56.8) | 47.8<br>(37.0, 58.7) | 5.5<br>(2.8, 8.3) | 36.5<br>(29.8, 43.3) | 57.9<br>(48.4, 67.4) |

| Guideline (N recommendations)                                                              | Year | Overall        |                   |                   | Class I         |                   |                   | Class II     |                   |                   | Class III  |                 |                   |
|--------------------------------------------------------------------------------------------|------|----------------|-------------------|-------------------|-----------------|-------------------|-------------------|--------------|-------------------|-------------------|------------|-----------------|-------------------|
|                                                                                            |      | A              | B                 | C                 | A               | B                 | C                 | A            | B                 | C                 | A          | B               | C                 |
| <i>summary, median (IQR), %</i>                                                            |      |                |                   |                   |                 |                   |                   |              |                   |                   |            |                 |                   |
| <i>Electrophysiology</i>                                                                   |      |                |                   |                   |                 |                   |                   |              |                   |                   |            |                 |                   |
| Bradycardia and cardiac conduction delays (n = 144) <sup>22</sup>                          | 2018 | 2 (1.4)        | 75 (52.1)         | 67 (46.5)         | 2 (3.9)         | 28 (54.9)         | 21 (41.2)         | 0 (0)        | 28 (37.8)         | 46 (62.2)         | 0 (0)      | 19 (100)        | 0 (0)             |
| Ventricular arrhythmias and the prevention of sudden cardiac death (n = 183) <sup>23</sup> | 2017 | 11 (6)         | 134 (73.2)        | 38 (20.8)         | 7 (8.2)         | 67 (78.8)         | 11 (12.9)         | 2 (2.5)      | 56 (70)           | 22 (27.5)         | 2 (11.1)   | 11 (61.1)       | 5 (27.8)          |
| Supraventricular tachycardia (n = 125) <sup>24</sup>                                       | 2015 | 1 (0.8)        | 68 (54.4)         | 56 (44.8)         | 1 (2)           | 31 (62)           | 18 (36)           | 0 (0)        | 36 (50)           | 36 (50)           | 0 (0)      | 1 (33.3)        | 2 (66.7)          |
| Atrial fibrillation (n = 116) <sup>25</sup>                                                | 2014 | 10 (8.6)       | 47 (40.5)         | 59 (50.9)         | 6 (11.8)        | 16 (31.4)         | 29 (56.9)         | 4 (8.2)      | 23 (46.9)         | 22 (44.9)         | 0 (0)      | 8 (50)          | 8 (50)            |
| Device-based therapy of cardiac rhythm abnormalities (n = 122) <sup>26</sup>               | 2008 | 6 (4.9)        | 45 (36.9)         | 71 (58.2)         | 4 (10.5)        | 15 (39.5)         | 19 (50)           | 1 (2)        | 18 (36)           | 31 (62)           | 1 (2.9)    | 12 (35.3)       | 21 (61.8)         |
| <i>Electrophysiology summary, median (IQR), %</i>                                          | --   | 4.9 (1.4, 6.0) | 52.1 (40.5, 54.4) | 46.5 (44.8, 50.9) | 8.2 (3.9, 10.5) | 54.9 (39.5, 62.0) | 41.2 (36.0, 50.0) | 2.0 (0, 2.5) | 46.9 (37.8, 50.0) | 50.0 (44.9, 62.0) | 0 (0, 2.9) | 50 (35.3, 61.1) | 50.0 (27.8, 61.8) |

\*, no recommendation of this class

**eTable 2.** Levels of Evidence by Guideline and Category of Recommendation (ESC Guidelines)

| Guideline (N recommendations)                                                          | Year | Overall                |                         |                         | Class I                 |                         |                         | Class II            |                         |                         | Class III               |                         |                         |
|----------------------------------------------------------------------------------------|------|------------------------|-------------------------|-------------------------|-------------------------|-------------------------|-------------------------|---------------------|-------------------------|-------------------------|-------------------------|-------------------------|-------------------------|
|                                                                                        |      | A                      | B                       | C                       | A                       | B                       | C                       | A                   | B                       | C                       | A                       | B                       | C                       |
| <i>General cardiology</i>                                                              |      |                        |                         |                         |                         |                         |                         |                     |                         |                         |                         |                         |                         |
| Hypertension (n = 135) <sup>27</sup>                                                   | 2018 | 49<br>(36.3)           | 39<br>(28.9)            | 47<br>(34.8)            | 41<br>(47.1)            | 18<br>(20.7)            | 28<br>(32.2)            | 1<br>(2.9)          | 19<br>(54.3)            | 15<br>(42.9)            | 7<br>(53.8)             | 2<br>(15.4)             | 4<br>(30.8)             |
| Cardiovascular disease in pregnancy (n = 149) <sup>28</sup>                            | 2018 | 2 (1.3)                | 11<br>(7.4)             | 136<br>(91.3)           | 2<br>(2.5)              | 8<br>(9.9)              | 71<br>(87.7)            | 0 (0)               | 2<br>(3.6)              | 53<br>(96.4)            | 0 (0)                   | 1 (7.7)                 | 12<br>(92.3)            |
| Syncope (n = 114) <sup>29</sup>                                                        | 2018 | 5 (4.4)                | 51<br>(44.7)            | 58<br>(50.9)            | 4<br>(8.7)              | 20<br>(43.5)            | 22<br>(47.8)            | 0 (0)               | 29<br>(45.3)            | 35<br>(54.7)            | 1 (25)                  | 2 (50)                  | 1 (25)                  |
| Dyslipidemias (n = 97) <sup>30</sup>                                                   | 2016 | 30<br>(30.9)           | 18<br>(18.6)            | 49<br>(50.5)            | 15<br>(33.3)            | 4<br>(8.9)              | 26<br>(57.8)            | 11<br>(23.9)        | 13<br>(28.3)            | 22<br>(47.8)            | 4<br>(66.7)             | 1<br>(16.7)             | 1<br>(16.7)             |
| Cardiovascular disease prevention (n = 181) <sup>31</sup>                              | 2016 | 59<br>(32.6)           | 73<br>(40.3)            | 49<br>(27.1)            | 41<br>(43.6)            | 34<br>(36.2)            | 19<br>(20.2)            | 15<br>(19.5)        | 34<br>(44.2)            | 28<br>(36.4)            | 3 (30)                  | 5 (50)                  | 2 (20)                  |
| Perioperative cardiovascular evaluation for noncardiac surgery (n = 121) <sup>32</sup> | 2014 | 9 (7.4)                | 44<br>(36.4)            | 68<br>(56.2)            | 7 (14)                  | 11<br>(22)              | 32<br>(64)              | 1<br>(1.8)          | 27<br>(47.4)            | 29<br>(50.9)            | 1 (7.1)                 | 6<br>(42.9)             | 7 (50)                  |
| Diabetes mellitus (n = 83) <sup>33</sup>                                               | 2013 | 37<br>(44.6)           | 26<br>(31.3)            | 20<br>(24.1)            | 35<br>(68.6)            | 10<br>(19.6)            | 6<br>(11.8)             | 0 (0)               | 13<br>(50)              | 13<br>(50)              | 2<br>(33.3)             | 3 (50)                  | 1<br>(16.7)             |
| <i>General cardiology summary, median (IQR), %</i>                                     | --   | 30.9<br>(5.9,<br>34.4) | 31.3<br>(23.8,<br>38.3) | 50.5<br>(30.9,<br>53.5) | 33.3<br>(11.3,<br>45.3) | 20.7<br>(14.7,<br>29.1) | 47.8<br>(26.2,<br>60.9) | 1.8<br>(0,<br>11.2) | 45.3<br>(36.2,<br>48.7) | 50.0<br>(45.3,<br>52.8) | 30.0<br>(16.3,<br>43.5) | 42.9<br>(16.0,<br>50.0) | 25.0<br>(18.3,<br>40.4) |
| <i>Coronary artery disease</i>                                                         |      |                        |                         |                         |                         |                         |                         |                     |                         |                         |                         |                         |                         |
| Myocardial revascularization (n = 228) <sup>34</sup>                                   | 2018 | 60<br>(26.3)           | 82<br>(36)              | 86<br>(37.7)            | 40<br>(40)              | 30<br>(30)              | 30<br>(30)              | 16<br>(14.3)        | 45<br>(40.2)            | 51<br>(45.5)            | 4 (25)                  | 7<br>(43.8)             | 5<br>(31.3)             |

| Guideline (N recommendations)                              | Year | Overall              |                      |                      | Class I              |                      |                      | Class II            |                      |                      | Class III            |                      |                      |
|------------------------------------------------------------|------|----------------------|----------------------|----------------------|----------------------|----------------------|----------------------|---------------------|----------------------|----------------------|----------------------|----------------------|----------------------|
|                                                            |      | A                    | B                    | C                    | A                    | B                    | C                    | A                   | B                    | C                    | A                    | B                    | C                    |
| ST elevation myocardial infarction (n = 160) <sup>35</sup> | 2017 | 37<br>(23.1)         | 44<br>(27.5)         | 79<br>(49.4)         | 26<br>(28.3)         | 20<br>(21.7)         | 46<br>(50)           | 8<br>(15.4)         | 15<br>(28.8)         | 29<br>(55.8)         | 3<br>(18.8)          | 9<br>(56.3)          | 4 (25)               |
| Non-ST elevation acute syndrome (n = 134) <sup>36</sup>    | 2015 | 36<br>(26.9)         | 44<br>(32.8)         | 54<br>(40.3)         | 29<br>(36.7)         | 24<br>(30.4)         | 26<br>(32.9)         | 6<br>(12.8)         | 16<br>(34)           | 25<br>(53.2)         | 1<br>(12.5)          | 4 (50)               | 3<br>(37.5)          |
| Stable ischemic heart disease (n = 130) <sup>37</sup>      | 2013 | 21<br>(16.2)         | 44<br>(33.8)         | 65<br>(50)           | 17<br>(24.3)         | 23<br>(32.9)         | 30<br>(42.9)         | 0 (0)               | 20<br>(42.6)         | 27<br>(57.4)         | 4<br>(30.8)          | 1 (7.7)              | 8<br>(61.5)          |
| <i>Coronary artery disease summary, median (IQR), %</i>    | --   | 24.7<br>(21.4, 26.4) | 33.3<br>(31.5, 34.3) | 44.8<br>(39.6, 49.5) | 32.5<br>(27.3, 37.5) | 30.2<br>(27.9, 31.0) | 37.9<br>(32.2, 44.7) | 13.5<br>(9.6, 14.6) | 37.1<br>(32.7, 40.8) | 54.5<br>(51.3, 56.2) | 21.9<br>(17.2, 26.4) | 46.9<br>(34.9, 51.6) | 34.4<br>(29.7, 43.5) |
| <i>Vascular medicine</i>                                   |      |                      |                      |                      |                      |                      |                      |                     |                      |                      |                      |                      |                      |
| Peripheral artery disease (n = 125) <sup>38</sup>          | 2018 | 20<br>(16)           | 44<br>(35.2)         | 61<br>(48.8)         | 13<br>(25.5)         | 10<br>(19.6)         | 28<br>(54.9)         | 4<br>(6.3)          | 32<br>(50)           | 28<br>(43.8)         | 3 (30)               | 2 (20)               | 5 (50)               |
| Aortic disease (n = 119) <sup>39</sup>                     | 2014 | 4 (3.4)              | 18<br>(15.1)         | 97<br>(81.5)         | 4<br>(6.1)           | 5<br>(7.6)           | 57<br>(86.4)         | 0 (0)               | 13<br>(26.5)         | 36<br>(73.5)         | 0 (0)                | 0 (0)                | 4<br>(100)           |
| Pulmonary embolism (n = 71) <sup>40</sup>                  | 2014 | 10<br>(14.1)         | 34<br>(47.9)         | 27<br>(38)           | 7<br>(22.6)          | 15<br>(48.4)         | 9 (29)               | 0 (0)               | 17<br>(50)           | 17<br>(50)           | 3 (50)               | 2<br>(33.3)          | 1<br>(16.7)          |
| <i>Vascular medicine summary, median (IQR), %</i>          | --   | 14.1<br>(8.7, 15.0)  | 35.2<br>(25.1, 41.5) | 48.8<br>(43.4, 65.1) | 22.6<br>(14.3, 24.0) | 19.6<br>(13.6, 34.0) | 54.9<br>(41.9, 70.6) | 0 (0, 3.1)          | 50.0<br>(38.2, 50.0) | 50.0<br>(46.9, 61.7) | 30.0<br>(15.0, 40.0) | 20.0<br>(10.0, 26.6) | 50.0<br>(33.3, 75.0) |
| <i>Congenital and valvular heart disease</i>               |      |                      |                      |                      |                      |                      |                      |                     |                      |                      |                      |                      |                      |
| Valvular heart disease (n = 111) <sup>41</sup>             | 2017 | 2 (1.8)              | 21<br>(18.9)         | 88<br>(79.3)         | 0 (0)                | 11<br>(25)           | 33<br>(75)           | 2<br>(3.2)          | 8<br>(12.7)          | 53<br>(84.1)         | 0 (0)                | 2 (50)               | 2 (50)               |
| Infective endocarditis (n = 95) <sup>42</sup>              | 2015 | 1 (1.1)              | 48<br>(50.5)         | 46<br>(48.4)         | 1<br>(1.9)           | 38<br>(70.4)         | 15<br>(27.8)         | 0 (0)               | 10<br>(30.3)         | 23<br>(69.7)         | 0 (0)                | 0 (0)                | 8<br>(100)           |

| Guideline (N recommendations)                                         | Year | Overall          |                   |                   | Class I          |                   |                   | Class II   |                   |                   | Class III         |                   |                   |
|-----------------------------------------------------------------------|------|------------------|-------------------|-------------------|------------------|-------------------|-------------------|------------|-------------------|-------------------|-------------------|-------------------|-------------------|
|                                                                       |      | A                | B                 | C                 | A                | B                 | C                 | A          | B                 | C                 | A                 | B                 | C                 |
| Pericardial disease (n = 112) <sup>43</sup>                           | 2015 | 5 (4.5)          | 23 (20.5)         | 84 (75)           | 4 (7.3)          | 11 (20)           | 40 (72.7)         | 1 (2.1)    | 11 (22.9)         | 36 (75)           | 0 (0)             | 1 (11.1)          | 8 (88.9)          |
| Pulmonary hypertension (n = 211) <sup>44</sup>                        | 2015 | 8 (3.8)          | 41 (19.4)         | 162 (76.8)        | 8 (9)            | 26 (29.2)         | 55 (61.8)         | 0 (0)      | 12 (11.7)         | 91 (88.3)         | 0 (0)             | 3 (15.8)          | 16 (84.2)         |
| Adult congenital heart disease (n = 105) <sup>45</sup>                | 2010 | 0 (0)            | 4 (3.8)           | 101 (96.2)        | 0 (0)            | 4 (8.2)           | 45 (91.8)         | 0 (0)      | 0 (0)             | 48 (100)          | 0 (0)             | 0 (0)             | 8 (100)           |
| <i>Congenital and valvular heart disease summary, median (IQR), %</i> | --   | 1.8 (1.1, 3.8)   | 19.4 (18.9, 20.5) | 76.8 (75, 79.3)   | 0.9 (0, 3.2)     | 25.0 (20.0, 29.2) | 72.7 (61.8, 75.0) | 0 (0, 2.1) | 12.7 (11.7, 22.9) | 84.1 (75, 88.3)   | 0 (0, 0)          | 11.1 (0, 15.8)    | 88.9 (84.2, 100)  |
| <i>Heart failure and myocardial disease</i>                           |      |                  |                   |                   |                  |                   |                   |            |                   |                   |                   |                   |                   |
| Acute and chronic heart failure (n = 187) <sup>46</sup>               | 2016 | 38 (20.3)        | 57 (30.5)         | 92 (49.2)         | 23 (29.1)        | 15 (19)           | 41 (51.9)         | 5 (6)      | 36 (43.4)         | 42 (50.6)         | 10 (40)           | 6 (24)            | 9 (36)            |
| Hypertrophic cardiomyopathy (n = 132) <sup>47</sup>                   | 2014 | 0 (0)            | 36 (27.3)         | 96 (72.7)         | 0 (0)            | 22 (40.7)         | 32 (59.3)         | 0 (0)      | 13 (17.3)         | 62 (82.7)         | 0 (0)             | 1 (33.3)          | 2 (66.7)          |
| <i>Heart failure and myocardial disease summary, median (IQR), %</i>  | --   | 10.1 (5.1, 15.2) | 28.9 (28.1, 29.7) | 60.9 (55.1, 66.8) | 14.5 (7.3, 21.8) | 29.8 (24.4, 35.3) | 55.6 (53.7, 57.4) | 0 (0, 0)   | 30.3 (23.8, 36.9) | 66.6 (58.6, 74.7) | 20.0 (10.0, 30.0) | 28.6 (26.3, 31.0) | 51.3 (43.7, 59.0) |
| <i>Electrophysiology</i>                                              |      |                  |                   |                   |                  |                   |                   |            |                   |                   |                   |                   |                   |
| Atrial fibrillation (n = 154) <sup>48</sup>                           | 2016 | 22 (14.3)        | 80 (51.9)         | 52 (33.8)         | 14 (29.8)        | 23 (48.9)         | 10 (21.3)         | 5 (5.3)    | 51 (54.3)         | 38 (40.4)         | 3 (23.1)          | 6 (46.2)          | 4 (30.8)          |
| Ventricular arrhythmias (n = 247) <sup>49</sup>                       | 2015 | 15 (6.1)         | 96 (38.9)         | 136 (55.1)        | 11 (8.9)         | 48 (38.7)         | 65 (52.4)         | 1 (0.9)    | 43 (39.4)         | 65 (59.6)         | 3 (21.4)          | 5 (35.7)          | 6 (42.9)          |



| Guideline (N recommendations)                                       | Year | Overall         |                   |                   | Class I          |                   |                   | Class II       |                   |                   | Class III        |                   |                   |
|---------------------------------------------------------------------|------|-----------------|-------------------|-------------------|------------------|-------------------|-------------------|----------------|-------------------|-------------------|------------------|-------------------|-------------------|
|                                                                     |      | A               | B                 | C                 | A                | B                 | C                 | A              | B                 | C                 | A                | B                 | C                 |
| Pacing and cardiac resynchronization therapy (n = 66) <sup>50</sup> | 2013 | 6 (9.1)         | 32 (48.5)         | 28 (42.4)         | 3 (12.5)         | 10 (41.7)         | 11 (45.8)         | 2 (6.3)        | 17 (53.1)         | 13 (40.6)         | 1 (10)           | 5 (50)            | 4 (40)            |
| Supraventricular arrhythmias (n = 132) <sup>51</sup>                | 2003 | 8 (6.1)         | 43 (32.6)         | 81 (61.4)         | 4 (6.7)          | 32 (53.3)         | 24 (40)           | 4 (6.5)        | 9 (14.5)          | 49 (79)           | 0 (0)            | 2 (20)            | 8 (80)            |
| <i>Electrophysiology summary, median (IQR), %</i>                   | --   | 7.6 (6.1, 10.4) | 43.7 (37.3, 49.3) | 48.7 (40.2, 56.7) | 10.7 (8.3, 16.8) | 45.3 (40.9, 50.0) | 42.9 (35.3, 47.4) | 5.8 (4.2, 6.3) | 46.2 (33.2, 53.4) | 50.1 (40.5, 64.4) | 15.7 (7.5, 21.8) | 40.9 (31.8, 47.1) | 41.4 (37.7, 52.2) |

**eFigure.** Proportion of Recommendations Characterized as Level of Evidence A by Year of Guideline Document Release

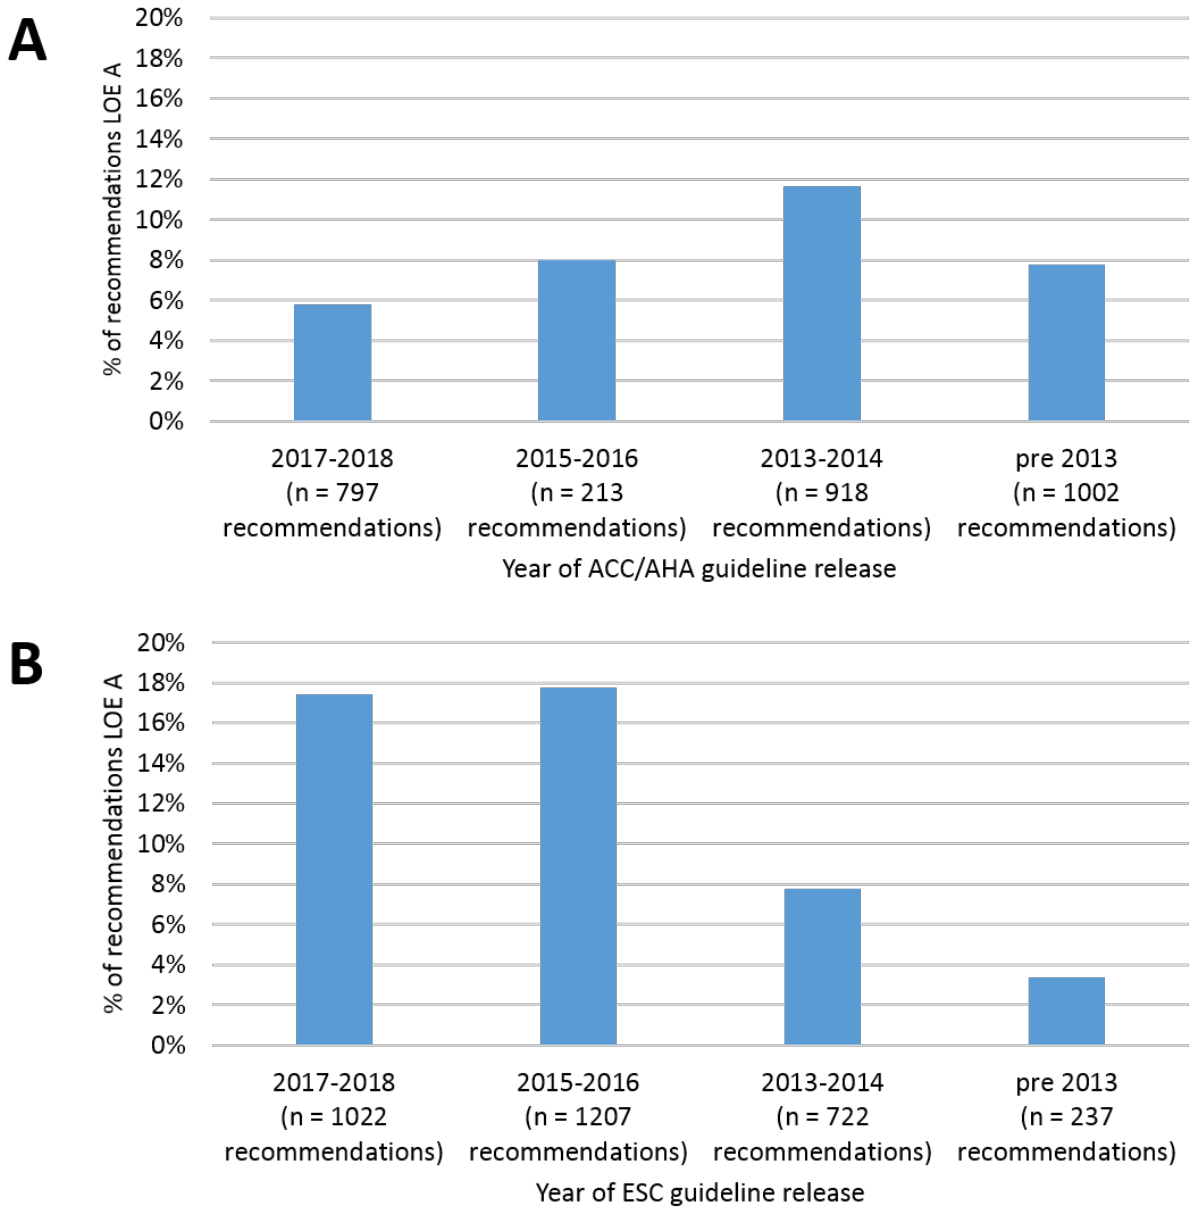

Panel A represents current ACC/AHA guidelines; Panel B represents current ESC guidelines

## eReferences

1. Grundy SM, Stone NJ, Bailey AL, Beam C, Birtcher KK, Blumenthal RS, Braun LT, de Ferranti S, Faiella-Tommasino J, Forman DE, Goldberg R, Heidenreich PA, Hlatky MA, Jones DW, Lloyd-Jones D, Lopez-Pajares N, Ndumele CE, Orringer CE, Peralta CA, Saseen JJ, Smith SC, Sperling L, Virani SS and Yeboah J. 2018  
AHA/ACC/AACVPR/AAPA/ABC/ACPM/ADA/AGS/APhA/ASPC/NLA/PCNA Guideline on the Management of Blood Cholesterol. *J Am Coll Cardiol.* 2018;25709.
2. Whelton PK, Carey RM, Aronow WS, Casey DE, Jr., Collins KJ, Dennison Himmelfarb C, DePalma SM, Gidding S, Jamerson KA, Jones DW, MacLaughlin EJ, Muntner P, Ovbiagele B, Smith SC, Jr., Spencer CC, Stafford RS, Taler SJ, Thomas RJ, Williams KA, Sr., Williamson JD and Wright JT, Jr. 2017  
ACC/AHA/AAPA/ABC/ACPM/AGS/APhA/ASH/ASPC/NMA/PCNA Guideline for the Prevention, Detection, Evaluation, and Management of High Blood Pressure in Adults: A Report of the American College of Cardiology/American Heart Association Task Force on Clinical Practice Guidelines. *J Am Coll Cardiol.* 2018;71:e127-e248.
3. Shen WK, Sheldon RS, Benditt DG, Cohen MI, Forman DE, Goldberger ZD, Grubb BP, Hamdan MH, Krahn AD, Link MS, Olshansky B, Raj SR, Sandhu RK, Sorajja D, Sun BC and Yancy CW. 2017 ACC/AHA/HRS Guideline for the Evaluation and Management of Patients With Syncope: A Report of the American College of Cardiology/American Heart Association Task Force on Clinical Practice Guidelines and the Heart Rhythm Society. *J Am Coll Cardiol.* 2017;70:e39-e110.
4. Fleisher LA, Fleischmann KE, Auerbach AD, Barnason SA, Beckman JA, Bozkurt B, Davila-Roman VG, Gerhard-Herman MD, Holly TA, Kane GC, Marine JE, Nelson MT, Spencer CC, Thompson A, Ting HH, Uretsky BF, Wijeyesundera DN. 2014 ACC/AHA guideline on perioperative cardiovascular evaluation and management of patients undergoing noncardiac surgery: a report of the American College of Cardiology/American Heart Association Task Force on practice guidelines. *J Am Coll Cardiol.* 2014;64:e77-137.
5. Goff DC, Lloyd-Jones DM, Bennett G, Coady S, D'Agostino RB, Gibbons R, Greenland P, Lackland DT, Levy D, O'Donnell CJ, Robinson JG, Schwartz JS, Shero ST, Smith SC, Sorlie P, Stone NJ and Wilson PWF. 2013 ACC/AHA Guideline on the Assessment of Cardiovascular Risk. *J Am Coll Cardiol.* 2014;63:2935-2959.
6. Eckel RH, Jakicic JM, Ard JD, de Jesus JM, Houston Miller N, Hubbard VS, Lee IM, Lichtenstein AH, Loria CM, Millen BE, Nonas CA, Sacks FM, Smith SC, Jr., Svetkey LP, Wadden TA, Yanovski SZ. 2013 AHA/ACC guideline on lifestyle management to reduce cardiovascular risk: a report of the American College of Cardiology/American Heart Association Task Force on Practice Guidelines. *J Am Coll Cardiol.* 2014;63:2960-84.
7. Jensen MD, Ryan DH, Apovian CM, Ard JD, Comuzzie AG, Donato KA, Hu FB, Hubbard VS, Jakicic JM, Kushner RF, Loria CM, Millen BE, Nonas CA, Pi-Sunyer FX, Stevens J, Stevens VJ, Wadden TA, Wolfe BM, Yanovski SZ. 2013 AHA/ACC/TOS guideline for the management of overweight and obesity in adults: A report of the American College of Cardiology/American Heart Association Task Force on Practice Guidelines and The Obesity Society. *J Am Coll Cardiol.* 2014;63:2985-3023.
8. Mosca L, Benjamin EJ, Berra K, Bezanson JL, Dolor RJ, Lloyd-Jones DM, Newby LK, Piña IL, Roger VL, Shaw LJ, Zhao D, Beckie TM, Bushnell C, D'Armiento J, Kris-Etherton PM, Fang J, Ganiats TG, Gomes AS, Gracia CR, Haan CK, Jackson EA, Judelson DR, Kelepouris E, Lavie CJ, Moore A, Nussmeier NA, Ofili E, Oparil S, Ouyang P, Pinn VW, Sherif K, Smith SC,

Sopko G, Chandra-Strobos N, Urbina EM, Vaccarino V and Wenger NK. Effectiveness-Based Guidelines for the Prevention of Cardiovascular Disease in Women—2011 Update. *J Am Coll Cardiol*. 2011;57:1404-1423.

9. Greenland P, Alpert JS, Beller GA, Benjamin EJ, Budoff MJ, Fayad ZA, Foster E, Hlatky MA, Hodgson JM, Kushner FG, Lauer MS, Shaw LJ, Smith SC, Jr., Taylor AJ, Weintraub WS, Wenger NK, Jacobs AK, Smith SC, Jr., Anderson JL, Albert N, Buller CE, Creager MA, Ettinger SM, Guyton RA, Halperin JL, Hochman JS, Kushner FG, Nishimura R, Ohman EM, Page RL, Stevenson WG, Tarkington LG, Yancy CW. 2010 ACCF/AHA guideline for assessment of cardiovascular risk in asymptomatic adults: a report of the American College of Cardiology Foundation/American Heart Association Task Force on Practice Guidelines. *J Am Coll Cardiol*. 2010;56:e50-103.

10. Amsterdam EA, Wenger NK, Brindis RG, Casey DEJ, Ganiats TG, Holmes DRJ, Jaffe AS, Jneid H, Kelly RF, Kontos MC, Levine GN, Liebson PR, Mukherjee D, Peterson ED, Sabatine MS, Smalling RW and Zieman SJ. 2014 AHA/ACC Guideline for the Management of Patients With Non-ST-Elevation Acute Coronary Syndromes: A Report of the American College of Cardiology/American Heart Association Task Force on Practice Guidelines. *J Am Coll Cardiol*. 2014;64:e139-228.

11. Fihn SD, Gardin JM, Abrams J, Berra K, Blankenship JC, Dallas AP, Douglas PS, Foody JM, Gerber TC, Hinderliter AL, King SB, 3rd, Kligfield PD, Krumholz HM, Kwong RY, Lim MJ, Linderbaum JA, Mack MJ, Munger MA, Prager RL, Sabik JF, Shaw LJ, Sikkema JD, Smith CR, Jr., Smith SC, Jr., Spertus JA, Williams SV. 2012

ACCF/AHA/ACP/AATS/PCNA/SCAI/STS Guideline for the diagnosis and management of patients with stable ischemic heart disease: A report of the American College of Cardiology Foundation/American Heart Association Task Force on Practice Guidelines, and the American College of Physicians, American Association for Thoracic Surgery, Preventive Cardiovascular Nurses Association, Society for Cardiovascular Angiography and Interventions, and Society of Thoracic Surgeons. *J Am Coll Cardiol*. 2012;60:e44-e164.

12. O'Gara PT, Kushner FG, Ascheim DD, Casey DE, Jr., Chung MK, de Lemos JA, Ettinger SM, Fang JC, Fesmire FM, Franklin BA, Granger CB, Krumholz HM, Linderbaum JA, Morrow DA, Newby LK, Ornato JP, Ou N, Radford MJ, Tamis-Holland JE, Tommaso CL, Tracy CM, Woo YJ, Zhao DX, Anderson JL, Jacobs AK, Halperin JL, Albert NM, Brindis RG, Creager MA, DeMets D, Guyton RA, Hochman JS, Kovacs RJ, Kushner FG, Ohman EM, Stevenson WG and Yancy CW. 2013 ACCF/AHA guideline for the management of ST-elevation myocardial infarction: a report of the American College of Cardiology Foundation/American Heart Association Task Force on Practice Guidelines. *J Am Coll Cardiol*. 2013;61:e78-140.

13. Hillis LD, Smith PK, Anderson JL, Bittl JA, Bridges CR, Byrne JG, Cigarroa JE, Disesa VJ, Hiratzka LF, Hutter AM, Jr., Jessen ME, Keeley EC, Lahey SJ, Lange RA, London MJ, Mack MJ, Patel MR, Puskas JD, Sabik JF, Selnes O, Shahian DM, Trost JC, Winniford MD. 2011 ACCF/AHA Guideline for Coronary Artery Bypass Graft Surgery. A report of the American College of Cardiology Foundation/American Heart Association Task Force on Practice Guidelines. Developed in collaboration with the American Association for Thoracic Surgery, Society of Cardiovascular Anesthesiologists, and Society of Thoracic Surgeons. *J Am Coll Cardiol*. 2011;58:e123-210.

14. Levine GN, Bates ER, Blankenship JC, Bailey SR, Bittl JA, Cercek B, Chambers CE, Ellis SG, Guyton RA, Hollenberg SM, Khot UN, Lange RA, Mauri L, Mehran R, Moussa ID, Mukherjee D, Nallamothu BK, Ting HH. 2011 ACCF/AHA/SCAI Guideline for Percutaneous

Coronary Intervention. A report of the American College of Cardiology Foundation/American Heart Association Task Force on Practice Guidelines and the Society for Cardiovascular Angiography and Interventions. *J Am Coll Cardiol*. 2011;58:e44-122.

15. Gerhard-Herman MD, Gornik HL, Barrett C, Barshes NR, Corriere MA, Drachman DE, Fleisher LA, Fowkes FG, Hamburg NM, Kinlay S, Lookstein R, Misra S, Mureebe L, Olin JW, Patel RA, Regensteiner JG, Schanzer A, Shishehbor MH, Stewart KJ, Treat-Jacobson D and Walsh ME. 2016 AHA/ACC Guideline on the Management of Patients With Lower Extremity Peripheral Artery Disease: A Report of the American College of Cardiology/American Heart Association Task Force on Clinical Practice Guidelines. *J Am Coll Cardiol*. 2017;69:e71-e126.

16. Brott TG, Halperin JL, Abbara S, Bacharach JM, Barr JD, Bush RL, Cates CU, Creager MA, Fowler SB, Friday G, Hertzberg VS, McCliff EB, Moore WS, Panagos PD, Riles TS, Rosenwasser RH and Taylor AJ. 2011

ASA/ACCF/AHA/AANN/AANS/ACR/ASNR/CNS/SAIP/SCAI/SIR/SNIS/SVM/SVS guideline on the management of patients with extracranial carotid and vertebral artery disease: A report of the American College of Cardiology Foundation/American Heart Association Task Force on Practice Guidelines, and the American Stroke Association, American Association of Neuroscience Nurses, American Association of Neurological Surgeons, American College of Radiology, American Society of Neuroradiology, Congress of Neurological Surgeons, Society of Atherosclerosis Imaging and Prevention, Society for Cardiovascular Angiography and Interventions, Society of Interventional Radiology, Society of NeuroInterventional Surgery, Society for Vascular Medicine, and Society for Vascular Surgery. *J Am Coll Cardiol*. 2011;57:e16-94.

17. Hiratzka LF, Bakris GL, Beckman JA, Bersin RM, Carr VF, Casey DE, Jr., Eagle KA, Hermann LK, Isselbacher EM, Kazerooni EA, Kouchoukos NT, Lytle BW, Milewicz DM, Reich DL, Sen S, Shinn JA, Svensson LG, Williams DM. 2010

ACCF/AHA/AATS/ACR/ASA/SCA/SCAI/SIR/STS/SVM Guidelines for the diagnosis and management of patients with thoracic aortic disease. A Report of the American College of Cardiology Foundation/American Heart Association Task Force on Practice Guidelines, American Association for Thoracic Surgery, American College of Radiology, American Stroke Association, Society of Cardiovascular Anesthesiologists, Society for Cardiovascular Angiography and Interventions, Society of Interventional Radiology, Society of Thoracic Surgeons, and Society for Vascular Medicine. *J Am Coll Cardiol*. 2010;55:e27-e129.

18. Stout KK, Daniels CJ, Aboulhosn JA, Bozkurt B, Broberg CS, Colman JM, Crumb SR, Dearani JA, Fuller S, Gurvitz M, Khairy P, Landzberg MJ, Saini A, Valente AM and Van Hare GF. 2018 AHA/ACC Guideline for the Management of Adults With Congenital Heart Disease: A report of the American College of Cardiology/American Heart Association Task Force on Clinical Practice Guidelines. *J Am Coll Cardiol*. 2018. Epub ahead of print.

19. Nishimura RA, Otto CM, Bonow RO, Carabello BA, Erwin JP, 3rd, Guyton RA, O'Gara PT, Ruiz CE, Skubas NJ, Sorajja P, Sundt TM, 3rd, Thomas JD. 2014 AHA/ACC guideline for the management of patients with valvular heart disease: A report of the American College of Cardiology/American Heart Association Task Force on Practice Guidelines. *J Am Coll Cardiol*. 2014;63:e57-185.

20. Yancy CW, Jessup M, Bozkurt B, Butler J, Casey DE, Jr., Drazner MH, Fonarow GC, Geraci SA, Horwich T, Januzzi JL, Johnson MR, Kasper EK, Levy WC, Masoudi FA, McBride PE, McMurray JJ, Mitchell JE, Peterson PN, Riegel B, Sam F, Stevenson LW, Tang WH, Tsai EJ, Wilkoff BL. 2013 ACCF/AHA guideline for the management of heart failure: A report of the

American College of Cardiology Foundation/American Heart Association Task Force on Practice Guidelines. *J Am Coll Cardiol*. 2013;62:e147-239.

21. Gersh BJ, Maron BJ, Bonow RO, Dearani JA, Fifer MA, Link MS, Naidu SS, Nishimura RA, Ommen SR, Rakowski H, Seidman CE, Towbin JA, Udelson JE, Yancy CW. 2011 ACCF/AHA Guideline for the Diagnosis and Treatment of Hypertrophic Cardiomyopathy: A report of the American College of Cardiology Foundation/American Heart Association Task Force on Practice Guidelines. Developed in collaboration with the American Association for Thoracic Surgery, American Society of Echocardiography, American Society of Nuclear Cardiology, Heart Failure Society of America, Heart Rhythm Society, Society for Cardiovascular Angiography and Interventions, and Society of Thoracic Surgeons. *J Am Coll Cardiol*. 2011;58:e212-60.
22. Kusumoto FM, Schoenfeld MH, Barrett C, Edgerton JR, Ellenbogen KA, Gold MR, Goldschlager NF, Hamilton RM, Joglar JA, Kim RJ, Lee R, Marine JE, McLeod CJ, Oken KR, Patton KK, Pellegrini CN, Selzman KA, Thompson A and Varosy PD. 2018 ACC/AHA/HRS Guideline on the Evaluation and Management of Patients With Bradycardia and Cardiac Conduction Delay. *J Am Coll Cardiol*. 2018. Epub ahead of print.
23. Al-Khatib SM, Stevenson WG, Ackerman MJ, Bryant WJ, Callans DJ, Curtis AB, Deal BJ, Dickfeld T, Field ME, Fonarow GC, Gillis AM, Hlatky MA, Granger CB, Hammill SC, Joglar JA, Kay GN, Matlock DD, Myerburg RJ and Page RL. 2017 AHA/ACC/HRS Guideline for Management of Patients With Ventricular Arrhythmias and the Prevention of Sudden Cardiac Death: A report of the American College of Cardiology/American Heart Association Task Force on Clinical Practice Guidelines and the Heart Rhythm Society. *J Am Coll Cardiol*. 2017.
24. Page RL, Joglar JA, Caldwell MA, Calkins H, Conti JB, Deal BJ, Estes NAM, 3rd, Field ME, Goldberger ZD, Hammill SC, Indik JH, Lindsay BD, Olshansky B, Russo AM, Shen WK, Tracy CM and Al-Khatib SM. 2015 ACC/AHA/HRS Guideline for the Management of Adult Patients With Supraventricular Tachycardia: A report of the American College of Cardiology/American Heart Association Task Force on Clinical Practice Guidelines and the Heart Rhythm Society. *J Am Coll Cardiol*. 2016;67:e27-e115.
25. January CT, Wann LS, Alpert JS, Calkins H, Cigarroa JE, Cleveland JC, Jr., Conti JB, Ellinor PT, Ezekowitz MD, Field ME, Murray KT, Sacco RL, Stevenson WG, Tchou PJ, Tracy CM and Yancy CW. 2014 AHA/ACC/HRS guideline for the management of patients with atrial fibrillation: A report of the American College of Cardiology/American Heart Association Task Force on Practice Guidelines and the Heart Rhythm Society. *J Am Coll Cardiol*. 2014;64:e1-76.
26. Epstein AE, DiMarco JP, Ellenbogen KA, Estes NA, 3rd, Freedman RA, Gettes LS, Gillinov AM, Gregoratos G, Hammill SC, Hayes DL, Hlatky MA, Newby LK, Page RL, Schoenfeld MH, Silka MJ, Stevenson LW, Sweeney MO, Smith SC, Jr., Jacobs AK, Adams CD, Anderson JL, Buller CE, Creager MA, Ettinger SM, Faxon DP, Halperin JL, Hiratzka LF, Hunt SA, Krumholz HM, Kushner FG, Lytle BW, Nishimura RA, Ornato JP, Page RL, Riegel B, Tarkington LG, Yancy CW. ACC/AHA/HRS 2008 Guidelines for Device-Based Therapy of Cardiac Rhythm Abnormalities: A report of the American College of Cardiology/American Heart Association Task Force on Practice Guidelines, developed in collaboration with the American Association for Thoracic Surgery and Society of Thoracic Surgeons. *J Am Coll Cardiol*. 2008;51:e1-62.
27. Williams B, Mancina G, Spiering W, Agabiti Rosei E, Azizi M, Burnier M, Clement DL, Coca A, de Simone G, Dominiczak A, Kahan T, Mahfoud F, Redon J, Ruilope L, Zanchetti A, Kerins M, Kjeldsen SE, Kreutz R, Laurent S, Lip GYH, McManus R, Narkiewicz K, Ruschitzka

- F, Schmieder RE, Shlyakhto E, Tsioufis C, Aboyans V, Desormais I. 2018 ESC/ESH Guidelines for the management of arterial hypertension. *Eur Heart J*. 2018;39:3021-3104.
28. Regitz-Zagrosek V, Roos-Hesselink JW, Bauersachs J, Blomstrom-Lundqvist C, Cifkova R, De Bonis M, Iung B, Johnson MR, Kintscher U, Kranke P, Lang IM, Morais J, Pieper PG, Presbitero P, Price S, Rosano GMC, Seeland U, Simoncini T, Swan L, Warnes CA. 2018 ESC Guidelines for the management of cardiovascular diseases during pregnancy. *Eur Heart J*. 2018;39:3165-3241.
29. Brignole M, Moya A, de Lange FJ, Deharo JC, Elliott PM, Fanciulli A, Fedorowski A, Furlan R, Kenny RA, Martin A, Probst V, Reed MJ, Rice CP, Sutton R, Ungar A, van Dijk JG. 2018 ESC Guidelines for the diagnosis and management of syncope. *Eur Heart J*. 2018;39:1883-1948.
30. Catapano AL, Graham I, De Backer G, Wiklund O, Chapman MJ, Drexel H, Hoes AW, Jennings CS, Landmesser U, Pedersen TR, Reiner Z, Riccardi G, Taskinen MR, Tokgozoglu L, Verschuren WMM, Vlachopoulos C, Wood DA, Zamorano JL, Cooney MT. 2016 ESC/EAS Guidelines for the Management of Dyslipidaemias. *Eur Heart J*. 2016;37:2999-3058.
31. Piepoli MF, Hoes AW, Agewall S, Albus C, Brotons C, Catapano AL, Cooney MT, Corra U, Cosyns B, Deaton C, Graham I, Hall MS, Hobbs FDR, Locher ML, Lollgen H, Marques-Vidal P, Perk J, Prescott E, Redon J, Richter DJ, Sattar N, Smulders Y, Tiberi M, van der Worp HB, van Dis I, Verschuren WMM, Binno S. 2016 European Guidelines on cardiovascular disease prevention in clinical practice: The Sixth Joint Task Force of the European Society of Cardiology and Other Societies on Cardiovascular Disease Prevention in Clinical Practice. Developed with the special contribution of the European Association for Cardiovascular Prevention & Rehabilitation (EACPR). *Eur Heart J*. 2016;37:2315-2381.
32. Kristensen SD, Knuuti J, Saraste A, Anker S, Botker HE, Hert SD, Ford I, Gonzalez-Juanatey JR, Gorenek B, Heyndrickx GR, Hoeft A, Huber K, Iung B, Kjeldsen KP, Longrois D, Luscher TF, Pierard L, Pocock S, Price S, Roffi M, Sirnes PA, Sousa-Uva M, Voudris V, Funck-Brentano C. 2014 ESC/ESA Guidelines on non-cardiac surgery: cardiovascular assessment and management: The Joint Task Force on non-cardiac surgery: cardiovascular assessment and management of the European Society of Cardiology (ESC) and the European Society of Anaesthesiology (ESA). *Eur Heart J*. 2014;35:2383-431.
33. Ryden L, Grant PJ, Anker SD, Berne C, Cosentino F, Danchin N, Deaton C, Escaned J, Hammes HP, Huikuri H, Marre M, Marx N, Mellbin L, Ostergren J, Patrono C, Seferovic P, Uva MS, Taskinen MR, Tendera M, Tuomilehto J, Valensi P and Zamorano JL. ESC Guidelines on diabetes, pre-diabetes, and cardiovascular diseases developed in collaboration with the EASD: the Task Force on diabetes, pre-diabetes, and cardiovascular diseases of the European Society of Cardiology (ESC) and developed in collaboration with the European Association for the Study of Diabetes (EASD). *Eur Heart J*. 2013;34:3035-87.
34. Neumann FJ, Sousa-Uva M, Ahlsson A, Alfonso F, Banning AP, Benedetto U, Byrne RA, Collet JP, Falk V, Head SJ, Juni P, Kastrati A, Koller A, Kristensen SD, Niebauer J, Richter DJ, Seferovic PM, Sibbing D, Stefanini GG, Windecker S, Yadav R, Zembala MO. 2018 ESC/EACTS Guidelines on myocardial revascularization. *Eur Heart J*. 2018. Epub ahead of print
35. Ibanez B, James S, Agewall S, Antunes MJ, Bucciarelli-Ducci C, Bueno H, Caforio ALP, Crea F, Goudevanos JA, Halvorsen S, Hindricks G, Kastrati A, Lenzen MJ, Prescott E, Roffi M, Valgimigli M, Varenhorst C, Vranckx P, Widimsky P. 2017 ESC Guidelines for the management of acute myocardial infarction in patients presenting with ST-segment elevation: The Task Force

for the management of acute myocardial infarction in patients presenting with ST-segment elevation of the European Society of Cardiology (ESC). *Eur Heart J.* 2018;39:119-177.

36. Roffi M, Patrono C, Collet JP, Mueller C, Valgimigli M, Andreotti F, Bax JJ, Borger MA, Brotons C, Chew DP, Gencer B, Hasenfuss G, Kjeldsen K, Lancellotti P, Landmesser U, Mehilli J, Mukherjee D, Storey RF, Windecker S. 2015 ESC Guidelines for the management of acute coronary syndromes in patients presenting without persistent ST-segment elevation: Task Force for the Management of Acute Coronary Syndromes in Patients Presenting without Persistent ST-Segment Elevation of the European Society of Cardiology (ESC). *Eur Heart J.* 2016;37:267-315.

37. Montalescot G, Sechtem U, Achenbach S, Andreotti F, Arden C, Budaj A, Bugiardini R, Crea F, Cuisset T, Di Mario C, Ferreira JR, Gersh BJ, Gitt AK, Hulot JS, Marx N, Opie LH, Pfisterer M, Prescott E, Ruschitzka F, Sabate M, Senior R, Taggart DP, van der Wall EE and Vrints CJ. 2013 ESC guidelines on the management of stable coronary artery disease: the Task Force on the management of stable coronary artery disease of the European Society of Cardiology. *Eur Heart J.* 2013;34:2949-3003.

38. Aboyans V, Ricco JB, Bartelink MEL, Bjorck M, Brodmann M, Cohnert T, Collet JP, Czerny M, De Carlo M, Debus S, Espinola-Klein C, Kahan T, Kownator S, Mazzolai L, Naylor AR, Roffi M, Rother J, Sprynger M, Tendera M, Tepe G, Venermo M, Vlachopoulos C, Desormais I. 2017 ESC Guidelines on the Diagnosis and Treatment of Peripheral Arterial Diseases, in collaboration with the European Society for Vascular Surgery (ESVS). Endorsed by: the European Stroke Organization (ESO)The Task Force for the Diagnosis and Treatment of Peripheral Arterial Diseases of the European Society of Cardiology (ESC) and of the European Society for Vascular Surgery (ESVS). *Eur Heart J.* 2018;39:763-816.

39. Erbel R, Aboyans V, Boileau C, Bossone E, Bartolomeo RD, Eggebrecht H, Evangelista A, Falk V, Frank H, Gaemperli O, Grabenwoger M, Haverich A, Iung B, Manolis AJ, Meijboom F, Nienaber CA, Roffi M, Rousseau H, Sechtem U, Sirnes PA, Allmen RS, Vrints CJ. 2014 ESC Guidelines on the diagnosis and treatment of aortic diseases: Document covering acute and chronic aortic diseases of the thoracic and abdominal aorta of the adult. The Task Force for the Diagnosis and Treatment of Aortic Diseases of the European Society of Cardiology (ESC). *Eur Heart J.* 2014;35:2873-926.

40. Konstantinides SV, Torbicki A, Agnelli G, Danchin N, Fitzmaurice D, Galie N, Gibbs JS, Huisman MV, Humbert M, Kucher N, Lang I, Lankeit M, Lekakis J, Maack C, Mayer E, Meneveau N, Perrier A, Pruszczyk P, Rasmussen LH, Schindler TH, Svitil P, Vonk Noordegraaf A, Zamorano JL, Zompatori M. 2014 ESC guidelines on the diagnosis and management of acute pulmonary embolism. *Eur Heart J.* 2014;35:3033-69, 3069a-3069k.

41. Baumgartner H, Falk V, Bax JJ, De Bonis M, Hamm C, Holm PJ, Iung B, Lancellotti P, Lansac E, Rodriguez Munoz D, Rosenhek R, Sjogren J, Tornos Mas P, Vahanian A, Walther T, Wendler O, Windecker S, Zamorano JL. 2017 ESC/EACTS Guidelines for the management of valvular heart disease. *Eur Heart J.* 2017;38:2739-2791.

42. Habib G, Lancellotti P, Antunes MJ, Bongiorni MG, Casalta JP, Del Zotti F, Dulgheru R, El Khoury G, Erba PA, Iung B, Miro JM, Mulder BJ, Plonska-Gosciniak E, Price S, Roos-Hesselink J, Snygg-Martin U, Thuny F, Tornos Mas P, Vilacosta I, Zamorano JL. 2015 ESC Guidelines for the management of infective endocarditis: The Task Force for the Management of Infective Endocarditis of the European Society of Cardiology (ESC). Endorsed by: European Association for Cardio-Thoracic Surgery (EACTS), the European Association of Nuclear Medicine (EANM). *Eur Heart J.* 2015;36:3075-3128.



43. Adler Y, Charron P, Imazio M, Badano L, Baron-Esquivias G, Bogaert J, Brucato A, Gueret P, Klingel K, Lionis C, Maisch B, Mayosi B, Pavie A, Ristic AD, Sabate Tenas M, Seferovic P, Swedberg K, Tomkowski W. 2015 ESC Guidelines for the diagnosis and management of pericardial diseases: The Task Force for the Diagnosis and Management of Pericardial Diseases of the European Society of Cardiology (ESC) Endorsed by: The European Association for Cardio-Thoracic Surgery (EACTS). *Eur Heart J*. 2015;36:2921-2964.
44. Galie N, Humbert M, Vachiery JL, Gibbs S, Lang I, Torbicki A, Simonneau G, Peacock A, Vonk Noordegraaf A, Beghetti M, Ghofrani A, Gomez Sanchez MA, Hansmann G, Klepetko W, Lancellotti P, Matucci M, McDonagh T, Pierard LA, Trindade PT, Zompatori M, Hoeper M. 2015 ESC/ERS Guidelines for the diagnosis and treatment of pulmonary hypertension: The Joint Task Force for the Diagnosis and Treatment of Pulmonary Hypertension of the European Society of Cardiology (ESC) and the European Respiratory Society (ERS): Endorsed by: Association for European Paediatric and Congenital Cardiology (AEPC), International Society for Heart and Lung Transplantation (ISHLT). *Eur Heart J*. 2016;37:67-119.
45. Baumgartner H, Bonhoeffer P, De Groot NM, de Haan F, Deanfield JE, Galie N, Gatzoulis MA, Gohlke-Baerwolf C, Kaemmerer H, Kilner P, Meijboom F, Mulder BJ, Oechslin E, Oliver JM, Serraf A, Szatmari A, Thaulow E, Vouhe PR, Walma E. ESC Guidelines for the management of grown-up congenital heart disease (new version 2010). *Eur Heart J*. 2010;31:2915-57.
46. Ponikowski P, Voors AA, Anker SD, Bueno H, Cleland JGF, Coats AJS, Falk V, Gonzalez-Juanatey JR, Harjola VP, Jankowska EA, Jessup M, Linde C, Nihoyannopoulos P, Parissis JT, Pieske B, Riley JP, Rosano GMC, Ruilope LM, Ruschitzka F, Rutten FH, van der Meer P. 2016 ESC Guidelines for the diagnosis and treatment of acute and chronic heart failure: The Task Force for the diagnosis and treatment of acute and chronic heart failure of the European Society of Cardiology (ESC). Developed with the special contribution of the Heart Failure Association (HFA) of the ESC. *Eur Heart J*. 2016;37:2129-2200.
47. Elliott PM, Anastasakis A, Borger MA, Borggrefe M, Cecchi F, Charron P, Hagege AA, Lafont A, Limongelli G, Mahrholdt H, McKenna WJ, Mogensen J, Nihoyannopoulos P, Nistri S, Pieper PG, Pieske B, Rapezzi C, Rutten FH, Tillmanns C and Watkins H. 2014 ESC Guidelines on diagnosis and management of hypertrophic cardiomyopathy: the Task Force for the Diagnosis and Management of Hypertrophic Cardiomyopathy of the European Society of Cardiology (ESC). *Eur Heart J*. 2014;35:2733-79.
48. Kirchhof P, Benussi S, Kotecha D, Ahlsson A, Atar D, Casadei B, Castella M, Diener HC, Heidbuchel H, Hendriks J, Hindricks G, Manolis AS, Oldgren J, Popescu BA, Schotten U, Van Putte B, Vardas P. 2016 ESC Guidelines for the management of atrial fibrillation developed in collaboration with EACTS. *Eur Heart J*. 2016;37:2893-2962.
49. Priori SG, Blomstrom-Lundqvist C, Mazzanti A, Blom N, Borggrefe M, Camm J, Elliott PM, Fitzsimons D, Hatala R, Hindricks G, Kirchhof P, Kjeldsen K, Kuck KH, Hernandez-Madrid A, Nikolaou N, Norekval TM, Spaulding C, Van Veldhuisen DJ. 2015 ESC Guidelines for the management of patients with ventricular arrhythmias and the prevention of sudden cardiac death: The Task Force for the Management of Patients with Ventricular Arrhythmias and the Prevention of Sudden Cardiac Death of the European Society of Cardiology (ESC). Endorsed by: Association for European Paediatric and Congenital Cardiology (AEPC). *Eur Heart J*. 2015;36:2793-2867.
50. Brignole M, Auricchio A, Baron-Esquivias G, Bordachar P, Boriani G, Breithardt OA, Cleland J, Deharo JC, Delgado V, Elliott PM, Gorenek B, Israel CW, Leclercq C, Linde C, Mont

L, Padeletti L, Sutton R, Vardas PE, Guidelines ESCCfP, Zamorano JL, Achenbach S, Baumgartner H, Bax JJ, Bueno H, Dean V, Deaton C, Erol C, Fagard R, Ferrari R, Hasdai D, Hoes AW, Kirchhof P, Knuuti J, Kolh P, Lancellotti P, Linhart A, Nihoyannopoulos P, Piepoli MF, Ponikowski P, Sirnes PA, Tamargo JL, Tendera M, Torbicki A, Wijns W, Windecker S, Document R, Kirchhof P, Blomstrom-Lundqvist C, Badano LP, Aliyev F, Bansch D, Baumgartner H, Bsata W, Buser P, Charron P, Daubert JC, Dobreanu D, Faerstrand S, Hasdai D, Hoes AW, Le Heuzey JY, Mavrakis H, McDonagh T, Merino JL, Nawar MM, Nielsen JC, Pieske B, Poposka L, Ruschitzka F, Tendera M, Van Gelder IC and Wilson CM. 2013 ESC Guidelines on cardiac pacing and cardiac resynchronization therapy: the Task Force on cardiac pacing and resynchronization therapy of the European Society of Cardiology (ESC). Developed in collaboration with the European Heart Rhythm Association (EHRA). *Eur Heart J*. 2013;34:2281-329.

51. Blomström-Lundqvist C, Scheinman MM, Aliot EM, Alpert JS, Calkins H, Camm AJ, Campbell WB, Haines DE, Kuck KH, Lerman BB, Miller DD, Shaeffer CW, Stevenson WG, Tomaselli GF, Antman EM, Smith SC, Alpert JS, Faxon DP, Fuster V, Gibbons RJ, Gregoratos G, Hiratzka LF, Hunt SA, Jacobs AK, Russell RO, Priori SG, Blanc J-J, Budaj A, Burgos EF, Cowie M, Deckers JW, Garcia MAA, Klein WW, Lekakis J, Lindahl B, Mazzotta G, Morais JCA, Oto A, Smiseth O and Trappe H-J. ACC/AHA/ESC guidelines for the management of patients with supraventricular arrhythmias. *J Am Coll Cardiol*. 2003;42:1493-1531.
